# Supplementary material for: Loss of a Trans-Splicing nad1 Intron from Geraniaceae and Transfer of the Maturase Gene matR to the Nucleus in Pelargonium
Source: PubMed Central journal article supplement — Genome Biol Evol. 2016 Sep 23;8(10):3193–201. doi: 10.1093/gbe/evw233 (PMC5174742; doi:10.1093/gbe/evw233), 2016-09-23

**Table S1.** Mitochondrial intron content in Geraniales

|           | Melianthus villosus | Hypseocharis bilobata | Erodium moschatum | Monsonia emarginata <sup>1</sup> | Geranium maderense <sup>1</sup> | Pelargonium citronellum |
|-----------|---------------------|-----------------------|-------------------|----------------------------------|---------------------------------|-------------------------|
| ccmFCi829 | +                   | -                     | -                 | -                                | -                               | -                       |
| cox1i729  | -                   | -                     | -                 | -                                | -                               | -                       |
| cox2i373  | -                   | -                     | -                 | -                                | -                               | -                       |
| cox2i691  | +                   | -                     | -                 | -                                | -                               | -                       |
| nad1i394  | trans               | trans                 | trans             | trans                            | trans                           | trans                   |
| nad1477   | +                   | -                     | -                 | -                                | -                               | -                       |
| nad1i669  | trans               | -                     | -                 | -                                | -                               | -                       |
| nad1i728  | +                   | -                     | -                 | -                                | -                               | -                       |
| nad2i156  | +                   | -                     | -                 | -                                | -                               | -                       |
| nad2i542  | trans               | trans                 | trans             | trans                            | trans                           | trans                   |
| nad2i709  | +                   | -                     | -                 | -                                | -                               | -                       |
| nad2i1282 | +                   | -                     | -                 | -                                | -                               | -                       |
| nad4i461  | +                   | +                     | +                 | +                                | +                               | +                       |
| nad4i976  | +                   | -                     | -                 | -                                | -                               | -                       |
| nad4i1399 | +                   | +                     | +                 | +                                | +                               | +                       |
| nad5i230  | +                   | +                     | +                 | +                                | +                               | +                       |
| nad5i1455 | trans               | trans                 | trans             | trans                            | trans                           | -                       |
| nad5i1477 | trans               | trans                 | trans             | trans                            | trans                           | -                       |
| nad5i1872 | +                   | +                     | -                 | -                                | -                               | -                       |
| nad7i140  | +                   | +                     | +                 | +                                | +                               | -                       |
| nad7i209  | +                   | +                     | +                 | +                                | +                               | +                       |
| nad7i676  | -                   | +                     | -                 | -                                | -                               | -                       |
| nad7i917  | +                   | +                     | -                 | -                                | -                               | -                       |
| rpl2i917  | -                   | -                     | -                 | -                                | -                               | -                       |
| rps3i74   | +                   | -                     | -                 | -                                | -                               | -                       |
| rps10i235 | -                   | -                     | -                 | -                                | -                               | -                       |

<sup>1</sup> *Monsonia* and *Geranium* data from Park et al. (2015)

**Table S2.** Sequence and assembly data for Geraniales

| Taxa                           | Sequence Data |           | Velvet Mitochondrial Genome Assembly Results |                   |              |                      |               |
|--------------------------------|---------------|-----------|----------------------------------------------|-------------------|--------------|----------------------|---------------|
|                                | DNA           | RNA       | Kmer                                         | Expected Coverage | # of Contigs | Min Genome Size (kb) | Kmer Coverage |
| <i>Pelargonium citronellum</i> | SRX189589     | SRX910186 | 71                                           | 200               | 14           | 1800                 | 28-49         |
| <i>Pelargonium x hortorum</i>  | SRX189591     | SRX298050 | 71                                           | 20                | 25           | 4100                 | 12-14         |
| <i>Geranium maderense</i>      | SRX189585     | -         | 75                                           | 20                | 8            | 650                  | 17-20         |
| <i>Geranium incanum</i>        | -             | SRX910268 |                                              |                   |              |                      |               |
| <i>Monsonia emarginata</i>     | SRX189588     | SRX910269 | 71                                           | 50                | 15           | 620                  | 13-27         |
| <i>Erodium moschatum</i>       | SRX189582     | -         | 75                                           | 50                | 5            | 240                  | 29-35         |
| <i>Erodium texanum</i>         | -             | SRX907966 |                                              |                   |              |                      |               |
| <i>Hypseocharis bilobata</i>   | SRX189586     | SRX910270 | 55                                           | 20                | 46           | 2600                 | 15-20         |
| <i>Melianthus villosus</i>     | SRX189587     | SRX910793 | 71                                           | 50                | 6            | 460                  | 34-48         |

**Table S3.** Taxa used in the phylogenetic analysis of *matR*

| Group         | Species                        | Accession Number  | Reference                |
|---------------|--------------------------------|-------------------|--------------------------|
| Geraniales    | <i>Erodium moschatum</i>       | KX824067          | this study               |
| Geraniales    | <i>Geranium maderense</i>      | KP940515          | Park et al. 2015         |
| Geraniales    | <i>Hypseocharis bilobata</i>   | KX824070          | this study               |
| Geraniales    | <i>Melianthus villosus</i>     | KX824073          | this study               |
| Geraniales    | <i>Monsonia emarginata</i>     | KX824076          | this study               |
| Geraniales    | <i>Pelargonium citronellum</i> | KX824108-KX824109 | this study               |
| Geraniales    | <i>Viviania marifolia</i>      | KP962581          | Park et al. 2015         |
| Other Rosids  | <i>Brassica oleracea</i>       | KJ820683          | Grewe et al. 2014        |
| Other Rosids  | <i>Carica papaya</i>           | EU431224          | Rice et al. unpublished  |
| Other Rosids  | <i>Citrullus lanatus</i>       | GQ856147          | Alverson et al. 2010     |
| Other Rosids  | <i>Cucurbita pepo</i>          | GQ856148          | Alverson et al. 2010     |
| Other Rosids  | <i>Lotus japonicus</i>         | JN872551          | Kazakoff et al. 2012     |
| Other Rosids  | <i>Malus x domestica</i>       | FR714868          | Goremykin et al. 2012    |
| Other Rosids  | <i>Millettia pinnata</i>       | JN872550          | Kazakoff et al. 2012     |
| Other Rosids  | <i>Raphanus sativus</i>        | AB694744          | Tanaka et al. 2012       |
| Other Rosids  | <i>Ricinus communis</i>        | HQ874649          | Rivarola et al. 2011     |
| Other Rosids  | <i>Vigna radiata</i>           | HM367685          | Alverson et al. 2011     |
| Other Rosids  | <i>Vitis vinifera</i>          | FM179380          | Goremykin et al. 2008    |
| Asterids      | <i>Ajuga reptans</i>           | NC_023103         | Zhu et al. 2014          |
| Asterids      | <i>Boea hygrometrica</i>       | JN107812          | Zhang et al. 2011        |
| Asterids      | <i>Daucus carota</i>           | JQ248574          | Iorizzo et al. 2012      |
| Asterids      | <i>Mimulus guttatus</i>        | JN098455          | Mower et al. 2011        |
| Asterids      | <i>Nicotiana tabacum</i>       | BA000042          | Sugiyama et al. 2005     |
| Caryophyllids | <i>Beta vulgaris</i>           | BA000009          | Kubo et al. 2000         |
| Caryophyllids | <i>Silene conica</i>           | JF750627          | Sloan et al. 2012        |
| Caryophyllids | <i>Silene latifolia</i>        | HM562727          | Sloan et al. 2010        |
| Caryophyllids | <i>Silene noctiflora</i>       | JF750486          | Sloan et al. 2012        |
| Caryophyllids | <i>Silene vulgaris</i>         | JF750429          | Sloan et al. 2012        |
| Monocots      | <i>Bambusa oldhamii</i>        | EU365401          | Lin et al. unpublished   |
| Monocots      | <i>Oryza sativa</i>            | DQ167399          | Tian et al. 2006         |
| Monocots      | <i>Phoenix dactylifera</i>     | JN375330          | Fang et al. 2012         |
| Monocots      | <i>Sorghum bicolor</i>         | DQ984518          | Allen et al. unpublished |
| Monocots      | <i>Spirodela polyrhiza</i>     | JQ804980          | Wang et al. 2012         |
| Monocots      | <i>Tripsacum dactyloides</i>   | DQ984517          | Allen et al. unpublished |
| Monocots      | <i>Triticum aestivum</i>       | AP008982          | Ogihara et al. 2005      |
| Monocots      | <i>Zea mays</i>                | AY506529          | Clifton et al. 2004      |
| Magnoliids    | <i>Liriodendron tulipifera</i> | KC821969          | Richardson et al. 2013   |
| Amborellales  | <i>Amborella trichopoda</i>    | KF754803          | Rice et al. 2013         |

**Figure S1.** Results of the phylogenetic analysis with the full set of angiosperm *matR* sequences.

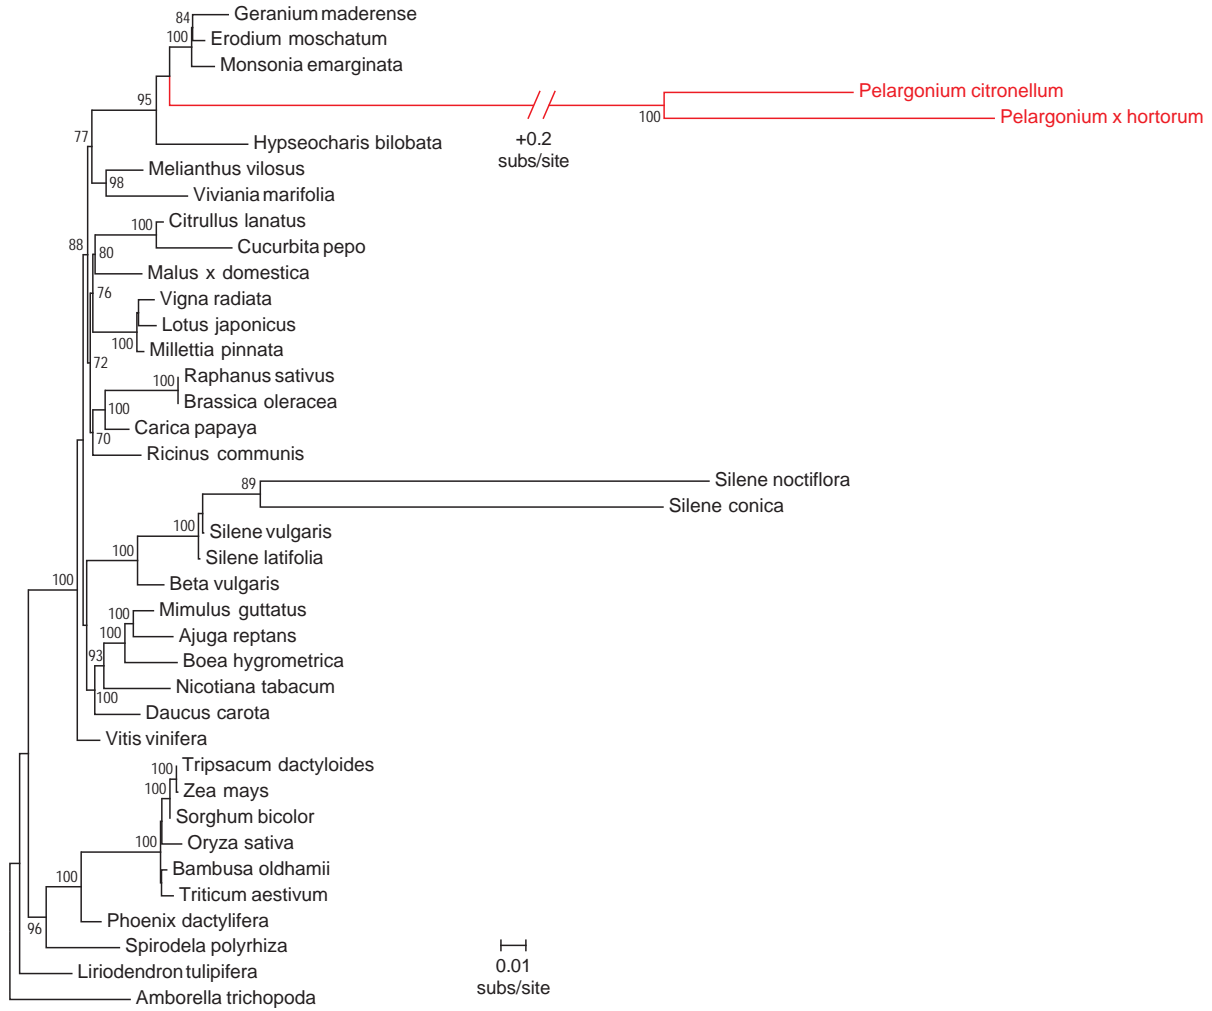

**Figure S2.** Schematic amino acid alignment of angiosperm mitochondrial *matR* sequences and the nuclear located *nmatRT* and *nmatRX* of *Pelargonium*. Highly conserved positions (i.e. identical amino acids in the alignment) are highlighted in black, all other positions are grey. Thin grey lines represent alignment gaps. Orange and yellow boxes show the location of maturase domains RT-2 to RT-7 and domain X, respectively.

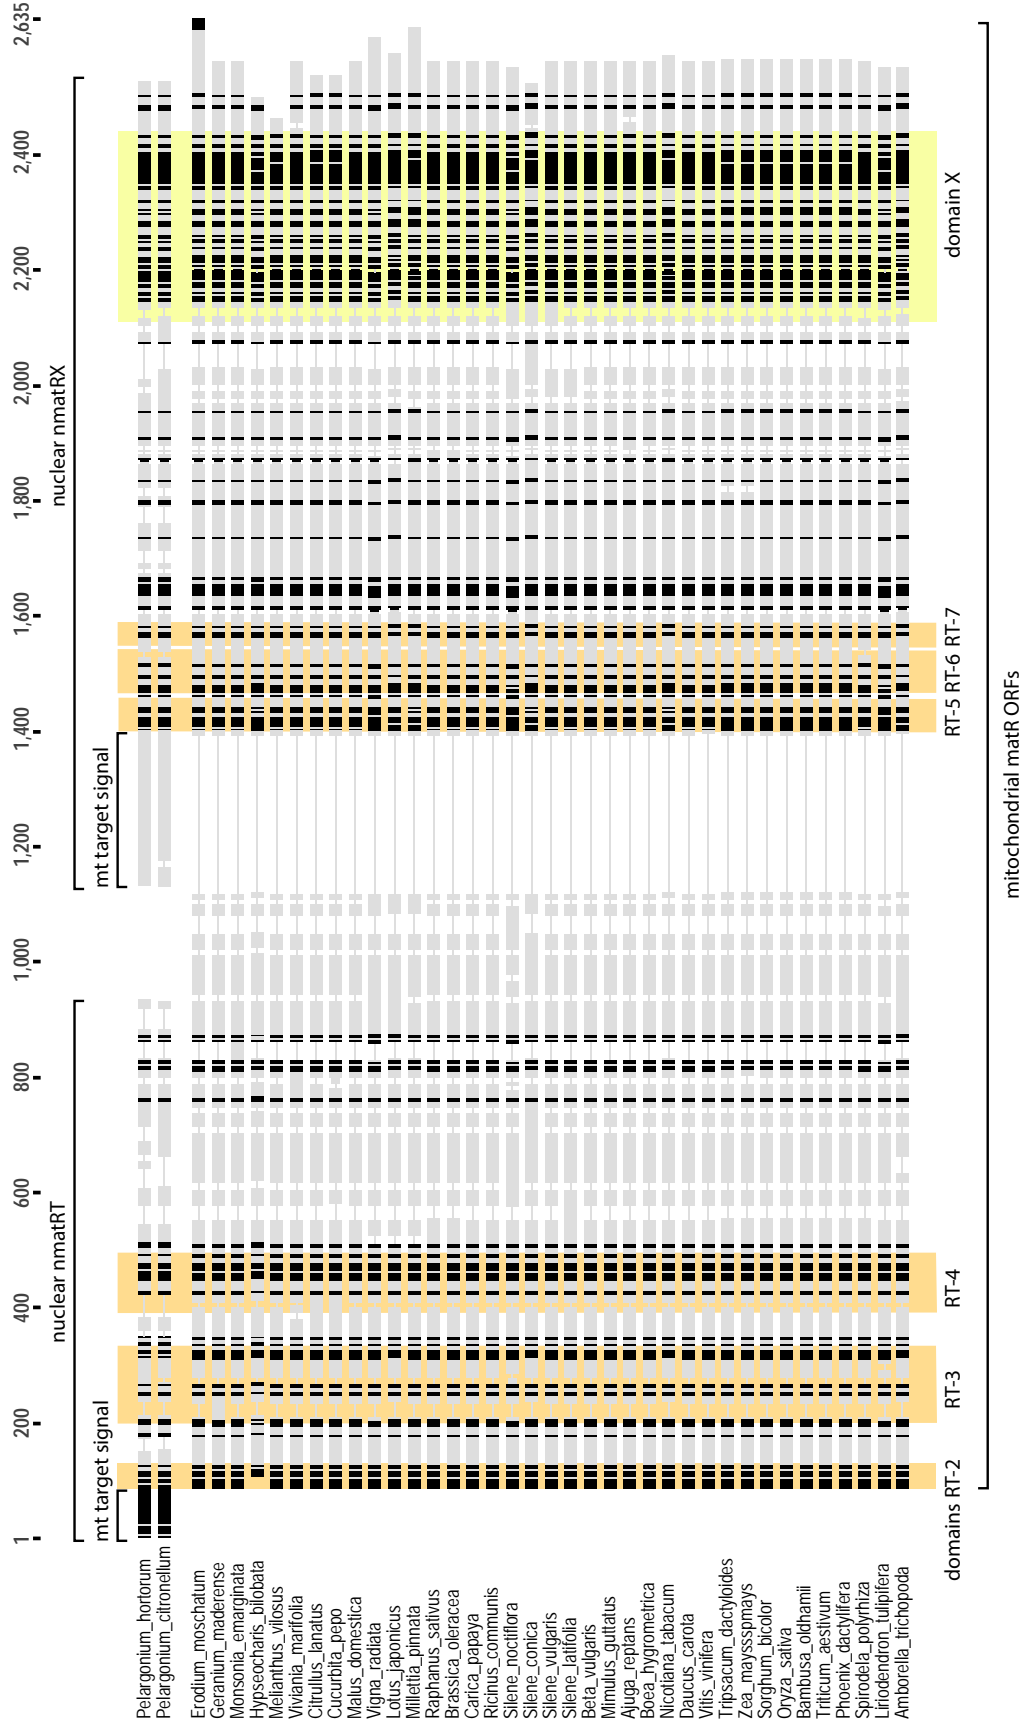

Supplement: supp_evw233_SuppFile-Rev1.pdf [file supp_evw233_SuppFile-Rev1.pdf]
